Diseases, European Society of Intensive Care Medicine, European Respiratory Society, International Sepsis Forum, Japanese Association for Acute Medicine, Japanese Society of Intensive Care Medicine, Society of Critical Care Medicine, Society of Hospital Medicine, Surgical Infection Society, World Federation of Societies of Intensive and Critical Care Medicine: Surviving Sepsis Campaign: International guidelines for management of severe sepsis and septic shock: 2008. *Crit Care Med* 2008; 36:296–327

31. Khuri SF, Henderson WG, DePalma RG, Mosca C, Healey NA,

Kumbhani DJ, Participants in the VA National Surgical Quality Improvement Program: Determinants of long-term survival after major surgery and the adverse effect of postoperative complications. *Ann Surg* 2005; 242:326–41

32. Zacharias M, Conlon NP, Herbison GP, Sivalingam P, Walker RJ, Hovhannisyan K: Interventions for protecting renal function in the perioperative period. *Cochrane Database Syst Rev* 2008; (4):CD003590

33. Sear JW: Kidney dysfunction in the postoperative period. *Br J Anaesth* 2005; 95:20–32

## ANESTHESIOLOGY REFLECTIONS

### *The Rider Tavern* by Vandam

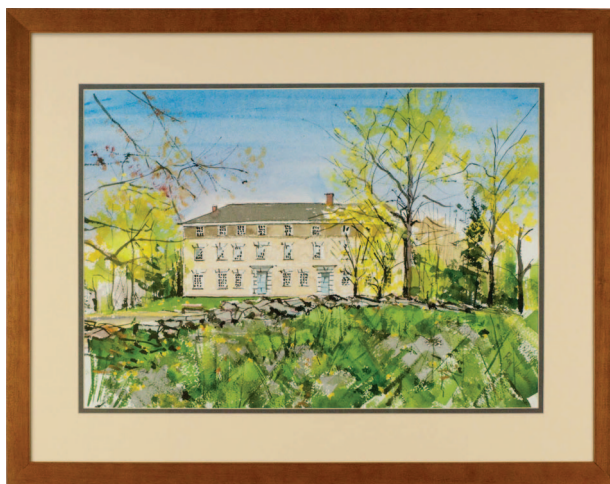

Home today to the Charlton Historical Society of Massachusetts, the Rider Tavern stands as “one of the least altered and best documented examples of a wayside tavern of the Federal period in New England.” Such “public” taverns (now “pubs” in Old England) demonstrated more open architecture than security-conscious “bars,” where portcullis-like security bars were lowered or positioned to protect stashes of alcoholic beverages. Some 22 yr after construction had begun on Rider Tavern, ether pioneer W. T. G. Morton was born nearby in 1819. Five years later, during an 1824 visit as a guest of U.S. President James Monroe, the Marquis de La Fayette inspected his fellow Revolutionary War veterans as they mustered outside Rider Tavern. A later visitor, a retired Editor of *ANESTHESIOLOGY*, Leroy D. Vandam, M.D. (1914–2004), memorialized the landmark (see above) as *The Rider Tavern*, a watercolor acquired by the Wood Library-Museum in 1993. (Copyright © the American Society of Anesthesiologists, Inc. This image appears in color in the *Anesthesiology Reflections* online collection available at [www.anesthesiology.org](http://www.anesthesiology.org).)

George S. Bause, M.D., M.P.H., Honorary Curator, ASA’s Wood Library-Museum of Anesthesiology, Park Ridge, Illinois, and Clinical Associate Professor, Case Western Reserve University, Cleveland, Ohio. [UJYC@aol.com](mailto:UJYC@aol.com).
